# Supplementary material for: The Colletotrichum siamense Hydrophobin CsHydr1 Interacts with the Lipid Droplet-Coating Protein CsCap20 and Regulates Lipid Metabolism and Virulence
Source: MDPI journal article supplement (doi:10.3390/jof8090977), 2022-09-19
Supplement: s1 [file s1]

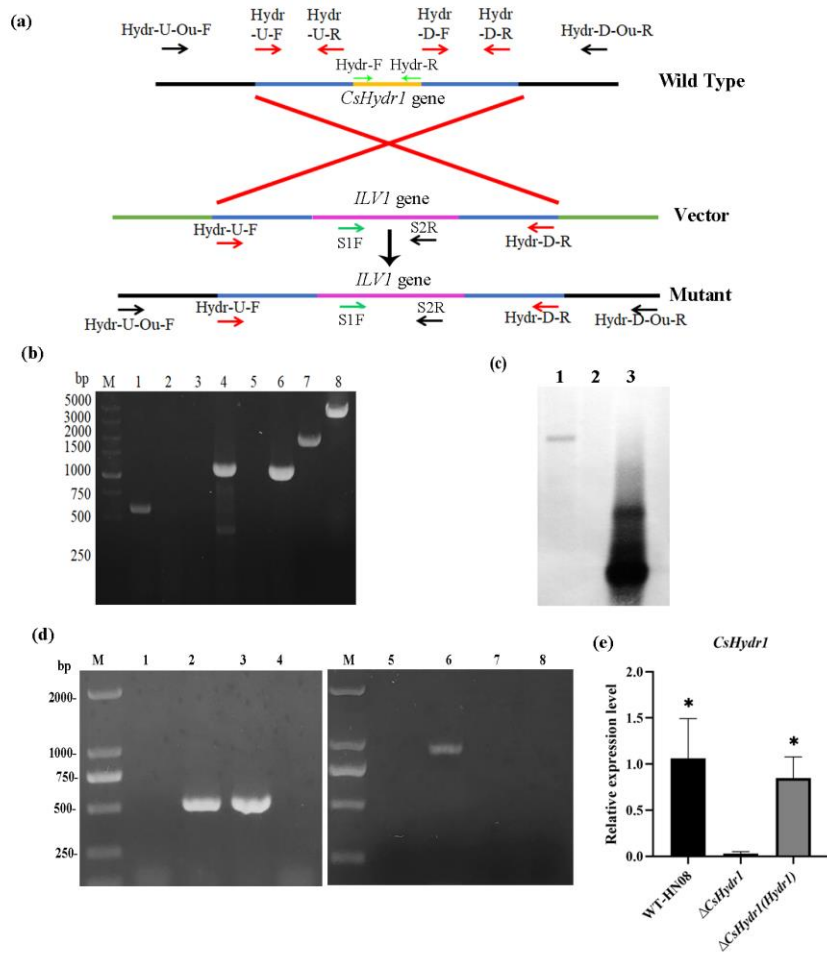

Figure S1. Schematic representation of the targeted deletion of the *CsHydr1* gene by the homologous recombination method and molecular confirmation. (a) Diagram describing the targeted gene deletion of *CsHydr1* and primers used for verification of the gene replacement event; (b) PCR verification of the  $\Delta CsHydr1$  mutant. (c) Southern blot analysis confirming the *ILV1* gene number in mutant. Genomic DNA in  $\Delta CsHydr1$  mutant (lane 1) and wild type (lane 2) was digested with *EcoRI* and probed with a *ILV1* coding sequence. Lane 3 was PCR fragment of *ILV1* showing as a positive control. (d) PCR verification of the strain  $\Delta CsHydr1(Hydr1)$ . M: DNA DL2000 marker; Lanes 1-4 were product amplified by Hydr-F/Hydr-R from  $\Delta CsHydr1$  mutant (lane 1),  $\Delta CsHydr1(Hydr1)$  (lane 2), wild-type (lane 3) and ddH<sub>2</sub>O (lane 4), respectively. Lanes 5-8 were product amplified by RP27-F/Hydr-R from  $\Delta CsHydr1$  mutant (lane 5),  $\Delta CsHydr1(Hydr1)$  (lane 6), wild-type (lane 7) and ddH<sub>2</sub>O (lane 8), respectively. (e) Relative expression of *CsHydr1* determined by qRT-PCR in  $\Delta CsHydr1(Hydr1)$  strains and wild type HN08. Expression levels were normalized using *ACT* expression levels as controls. Data were collected from three technical replicates. Error bars represent SD, \* indicated significant differences within each measurement group(\*p < 0.1, One-way Anova and Duncan's test) .

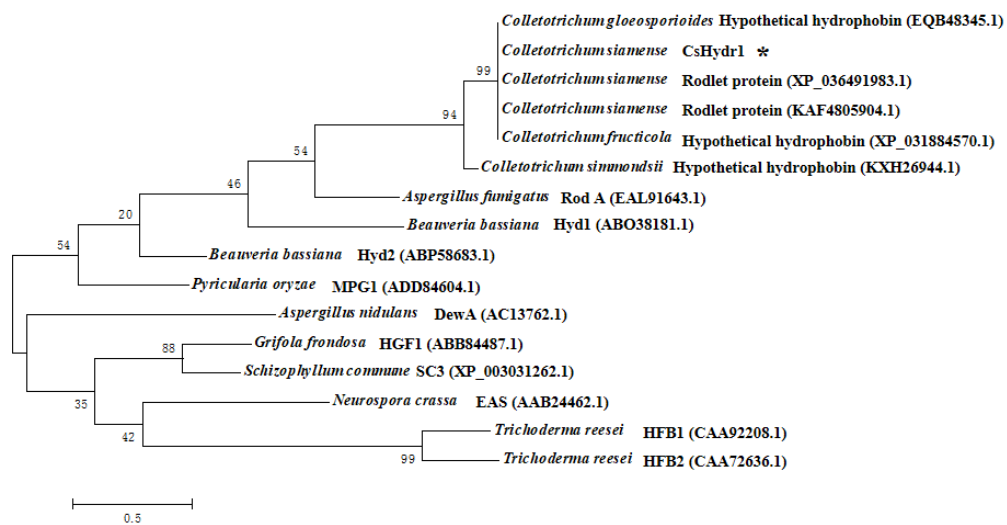

Figuer S2. Phylogenetic analysis of protein CsHydr1 and several known hydrophobin proteins in fungi. The phylogenetic tree was constructed with MEGA.6.0 using the maximum likelihood method. The CsHydr1 protein in this study was emphasized with a star.

Table S1 All the primers used in this study.

| Primer          | Sequence 5'-3'                                        |
|-----------------|-------------------------------------------------------|
| hydr-F          | CGCGGATCCGCGATGCGCTTCTCCGCTGCCACC                     |
| hydr-R          | CGAGCTCGTTACAAAAGACCAGAGATGGGG                        |
| Mi-H1-F         | CGGAATTCATGCGCTTCTCCGCTGCCAC                          |
| Mi-H1-R         | CCCTCGAGCAAAAAGACCAGAGATGGGGA                         |
| Mi-sp-H1-F      | CGGAATTCATGGCTCCCGGCAACACTGCC                         |
| Mi-sp-H1-R      | CCCTCGAGCAAAAAGACCAGAGATGGGGA                         |
| pSUC2-F         | TTCCTCGTCATTGTTCTCGTTC                                |
| pSUC2-R         | GTCTATCGCTAGTTTCGTTTGTCTC                             |
| Hydr-U-F        | CCCAAGCTTGGGGATAAATATCGATTGTAAC TC                    |
| Hydr-U-R        | CCGGAATTCCGGTTTCAAAGATAGAGTTGTTC                      |
| Hydr-D-F        | GCTCTCACCGCGGATCCGATACCAACCGGATACATGCAG               |
| Hydr-D-R        | CTAGAACTAGTGGATCTTGCGACAATCGCAGGCGGTTCG               |
| Hydr-U-Ou-F     | CGATGCGCTGTTTCATGCGGCTAC                              |
| Hydr-D-Ou-R     | GCACGATGAAGGTATCTATCC                                 |
| S2F             | GGCGGTGCTATCCTTCCCGTGTT                               |
| S1R             | GTTCAACGCCGCTTCCGACAAAAT                              |
| PXY203-Hydr1-F  | TTTCGTAGGAACCCAATCTTCAAAAATGCGCTTCTCCGCTGCCAC         |
| PXY203-Hydr1-R  | TTTGAATTTAGCAGCAGCGGTTTCTTTTACAAAAGACCAGAGATGG<br>GGA |
| RP27-F          | TTTCGTAGGAACCCAATCTTCAAAAATGGCCGACCCGTTTGCG           |
| BK-Hydr1-F      | CGGAATTCATGGCTCCCGGCAACACTGCC                         |
| BK-Hydr1-R      | CGGGATCCCAAAAAGACCAGAGATGGGGA                         |
| pGBKT7-F        | GTGCGACATCATCATCGGAAG                                 |
| pGBKT7-R        | CCGGAATTAGCTTGGCTGC                                   |
| AD-Cap20-F      | CGGAATTCATGTCCAAAATGGCCCAAGTC                         |
| AD-Cap20-R      | CGGGATCCGTTGTTGACCTTTTCGTTACG                         |
| pGADT7-F        | AATACCACTACAATGGATGATG                                |
| pGADT7-R        | GAGATGGTGCACGATGCACAGT                                |
| pGEX-6p-Hydr1-F | CGGGATCCATGGCTCCCGGCAACACTGCC                         |
| pGEX-6p-Hydr1-R | CGGAATTCCAAAAAGACCAGAGATGGGGA                         |
| pGEX-6p-1-F     | GACCCAATGTGCCTGGATGC                                  |

---

|               |                                                                                            |
|---------------|--------------------------------------------------------------------------------------------|
| pGEX-6p-1-R   | CCGCTTACAGACAAGCTGTG                                                                       |
| pET-Cap20-F   | CGGGATCCATGTCCAAAATGGCCCAAGTC                                                              |
| pET-Cap20-R   | CGGAATTCGTTGTTGACCTTTTCG TTCACG                                                            |
| pET32a-F      | CTTCTGGTCTGGTGCCACGCGG                                                                     |
| pET32a-R      | GCTTCCTTTCGGGCTTTGTTAG                                                                     |
| pFL21-Hydr1-F | CGACTCACTATAGGGCGAATTGGGTACTCAAATTGGGGTATTGAGC<br>GATAATGCCACA                             |
| pFL21-Hydr1-R | CACCACCCCGGTGAACAGCTCCTCGCCCTTGCTCACCAGATCCTCTT<br>CAGAGATGAGTTTCTGCTCCAAAAGACCAGAGATGGGGA |
| G418-F        | CAAGATGGATTGCACGCAGG                                                                       |
| G418-R        | CGCTATGTCCTGATAGCGGT                                                                       |
| Actin-F       | TGGTATGGGCCAGAAGGA                                                                         |
| Actin-R       | GGACGGAAGGAGCGAACA                                                                         |
| RT-Hydr1-F    | GCTCCCGGCAAACTGCC                                                                          |
| RT-Hydr1-R    | CAGTGAGCTTCAGGCCAC                                                                         |

---
